# Supplementary material for: Eltern von schwerkranken Kindern begleiten
Source: Springer Nature journal article supplement (doi:10.1007/s41906-021-1146-z), 2021-10-18
Supplement: MOESM1 [file 19770290]

## Literatur

### zum Beitrag „Eltern von schwerkranken Kindern begleiten“ von Carmen Eckerstorfer

*PflegeZeitschrift* (74) 11/2021, S. 28-30

Eckerstorfer C (2021) *IntensivLeben. Ein Begleitbuch für die Zeit auf der Kinderintensivstation.* Metatron Verlag, Kematen / Krems.

Fève A & Geipel J (2020) Herausforderungen und Bedürfnisse von Familien mit Neugeborenen mit Zwerchfellhernie. Musiktherapie als unterstützende Maßnahme? in: *Pflege* (2020), 33 (6): 365-373, Hogrefe Verlag, Bern.

Garten L & von der Hude K (Hrsg.) *Palliativversorgung und Trauerbegleitung in der Neonatologie.* 2. Aufl. Springer Verlag, Berlin Heidelberg.

Hausmann C (2009) *Psychologie und Kommunikation für Pflegeberufe.* 2. Aufl. Facultas Verlags- und Buchhandels AG, Wien.

Hausmann C (2016) *Interventionen der Notfallpsychologie. Was man tun kann, wenn das Schlimmste passiert.* Facultas Verlags- und Buchhandels AG, Wien.

Ritter M (2011) *Wenn ein Kind stirbt. Hilfe und Orientierung für Eltern, Geschwister und Begleitende.* Gütersloher Verlagshaus, Gütersloh.

Spitz-Köberich C et al (2010) Eltern eines kritisch kranken Kindes – Welche Erwartungen und Wünsche habe sie an das Team der pädiatrischen Intensivstation? in: *Pflege* (2010), 23 (5): 299-307, Verlag Hans Huber, Bern.
